# Supplementary material for: Optimization of Polyethylene Glycol-Mediated Transformation of the Pepper Anthracnose Pathogen Colletotrichum scovillei to Develop an Applied Genomics Approach
Source: PubMed Central journal article supplement — Plant Pathol J. 2019 Dec 12;35(6):575–84. doi: 10.5423/PPJ.OA.06.2019.0171 (PMC6901253; doi:10.5423/ppj.oa.06.2019.0171), 2019-12-12
Supplement: PPJ-35-575_Supple.pdf [file PPJ-35-575_Supple.pdf]

**Supplementary Table 1.** List of *Colletrotrichum* species and genes used for identification and phylogenetic study

| Species                   | Isolates           | GenBank accession No. <sup>a</sup> |          |          |          |              |          |
|---------------------------|--------------------|------------------------------------|----------|----------|----------|--------------|----------|
|                           |                    | ITS                                | TUB2     | ACT      | CHS-1    | GAPDH        | HIS3     |
| <i>C. scovillei</i>       | CBS 126529         | JQ948267                           | JQ949918 | JQ949588 | JQ948928 | JQ948597     | JQ949258 |
| <i>C. simmondsii</i>      | CBS 122122         | JQ948276                           | JQ949927 | JQ949597 | JQ948937 | JQ948606     | JQ949267 |
| <i>C. fioriniae</i>       | CBS 128517         | JQ948292                           | JQ949943 | JQ949613 | JQ948953 | JQ948622     | JQ949283 |
| <i>C. acutatum</i>        | CBS 112996         | JQ005776                           | JQ005860 | JQ005839 | JQ005797 | JQ948677     | JQ005818 |
| <i>C. graminicola</i>     | CBS 130826, M1.001 | JQ005767                           | JQ005851 | JQ005830 | JQ005788 | XM_008095871 | JQ005809 |
| <i>C. higginsianum</i>    | IMI 349063         | JQ005760                           | JQ005844 | JQ005823 | JQ005781 | KM105536     | JQ005802 |
| <i>C. gloeosporioides</i> | CBS 112999         | JQ005152                           | JQ005587 | JQ005500 | JQ005326 | JQ005239     | JQ005413 |
| <i>C. orbiculare</i>      | 104-T, CBS 107.17  | JQ005778                           | JQ005862 | JQ005841 | JQ005799 | KF178489     | JQ005820 |

<sup>a</sup>ITS, internal transcribed spacer; TUB2,  $\beta$ -tubulin; ACT, actin; CHS-1, chitin synthase 1; GAPDH, glyceraldehyde-3-phosphate dehydrogenase; HIS3, histone 3.

**Supplementary Table 2.** Primers used in this study

| Name          | Primer sequence 5' to 3'                       |
|---------------|------------------------------------------------|
| HPH_F         | GGCTTGGCTGGAGCTAGTGGAGG                        |
| HPH_R         | CTCCGGAGCTGACATCGACACCAAC                      |
| CSP_000836_5F | CCCAAGAGAACCAGTCACAAA                          |
| CSP_000836_5R | CCTCCACTAGCTCCAGCCAAGCCCGAAAGAGCTGCTGCAAATG    |
| CSP_000836_3F | GTTGGTGTGCGATGTCAGTCCGGAGGTCTCAATCCACCACCGTATC |
| CSP_000836_3R | CGGATGAATAGCTTGCCTACTG                         |
| CSP_000836_NF | TTGCATTTCCTCGGAGCTATC                          |
| CSP_000836_NR | CCGACCTGAAAGCCACATAA                           |
| CSP_000836_SF | GGAGAACGTCACCTCCTGTATC                         |
| CSP_000836_SR | TCGATTCAATCACGCCCTATC                          |
| CSP_000836_PF | CGTGTTTCTGCCGTATCCA                            |
| CSP_000836_PR | GGGTCTCCAATCTTGTCTCTTC                         |
| CSP_001376_5F | ACATGAACAGGCTCCAAGAT                           |
| CSP_001376_5R | CCTCCACTAGCTCCAGCCAAGCCCAAAGTCAAAGAAGCCCTCAC   |
| CSP_001376_3F | GTTGGTGTGCGATGTCAGTCCGGAGGTCTCTCCCGTTGAATGA    |
| CSP_001376_3R | CTGCGCTCATGGTCAAGATA                           |
| CSP_001376_NF | ACTCTGCACTTTCTCAACTACC                         |
| CSP_001376_NR | GAAGATCAAGACCGAGCGTATC                         |
| CSP_001376_SF | GGATGTTGTTGCAGTTGAGATTG                        |
| CSP_001376_SR | ACTAACTTCGGCCAACTTCAC                          |
| CSP_001376_PF | CTAAGGCCACGGACAATGAA                           |
| CSP_001376_PR | CGCCTCATTCGACTGACTAAA                          |
| CSP_000583_5F | ATAGCCGAAGCTTAGCACTG                           |
| CSP_000583_5R | CCTCCACTAGCTCCAGCCAAGCCGGCGGAGGACAATATCATGG    |
| CSP_000583_3F | GTTGGTGTGCGATGTCAGTCCGGAGGTATATGGTGATGCGGGTGAA |
| CSP_000583_3R | CTAATGACTGTCTGTCTCTGTGG                        |
| CSP_000583_NF | CCACCACTAAAGAACCTCACAG                         |
| CSP_000583_NR | GTCTCTTGAAGTGTCGAGAAGG                         |

|               |                                                   |
|---------------|---------------------------------------------------|
| CSP_000583_SF | AAGTCTGCGCCAAACCA                                 |
| CSP_000583_SR | GCTACAGCAAACCAACCAAC                              |
| CSP_000583_PF | GTACAACCACACTCTCACAC                              |
| CSP_000583_PR | CGATGAGGATGAGGGATACT                              |
| CSP_001741_5F | CGACCGTAAACTTGGCTGATA                             |
| CSP_001741_5R | CCTCCACTAGCTCCAGCCAAGCCGCTATCGACACACCTCTCAATTA    |
| CSP_001741_3F | GTTGGTGTGCGATGTCAGCTCCGGAGGCACTGAGCCTGTCATTCTA    |
| CSP_001741_3R | GACTTTGTACACCGCAATCATATC                          |
| CSP_001741_NF | GCTGTTACGAGCCTCTTCTT                              |
| CSP_001741_NR | TCATAGATGCTTGTGGGTTCC                             |
| CSP_001741_SF | CCGGTGATGCGGAATTCTAT                              |
| CSP_001741_SR | CTAGGGCGGCATTTCTATCAA                             |
| CSP_001741_PF | CTAGTCGTGTGCAGAGTATTAGAG                          |
| CSP_001741_PR | GGGATCGAGCTCGTGTTTAT                              |
| CSP_002212_5F | CATCGCCATCGCTCACAGG                               |
| CSP_002212_5R | CCTCCACTAGCTCCAGCCAAGCCGCTTTCGGTCTGCTATGTA        |
| CSP_002212_3F | GTTGGTGTGCGATGTCAGCTCCGGAGGGCGAGGGTCAAGATATAGATG  |
| CSP_002212_3R | TTCGTGGCTCTTGACTTAGG                              |
| CSP_002212_NF | AGCAGATGCTGGGTCACTA                               |
| CSP_002212_NR | AGGAACCTGAGGTCGGTTAT                              |
| CSP_002212_SF | TTGAAGAACGGTCAGGTCAAG                             |
| CSP_002212_SR | GCTGATGCAATGAGGATGAGA                             |
| CSP_002212_PF | GGCTGTTTGTGTCTTCA                                 |
| CSP_002212_PR | TTGGTGGCTCTTGACTTA                                |
| CSP_004175_5F | GTGTGTCAATTGTCTGGCTTTC                            |
| CSP_004175_5R | CCTCCACTAGCTCCAGCCAAGCCGCTGAGGGAGTCTCGGTATTAGTC   |
| CSP_004175_3F | GTTGGTGTGCGATGTCAGCTCCGGAGCTAGGACATGGCGTACATACAAA |
| CSP_004175_3R | TCCTCCTCTGAACTAGGCTAAA                            |
| CSP_004175_NF | GGGAAAGTGCAAGAGCAAGA                              |
| CSP_004175_NR | GGCGCACACTCTCGTAAATA                              |
| CSP_004175_SF | CATACCTGTTACCACCCAATTACA                          |
| CSP_004175_SR | CTGGTATATGTCAAGCGCCTAAA                           |
| CSP_004175_PF | TCGTTTCGTTCTGTTCTG                                |
| CSP_004175_PR | ATGCGGTACTAGGTGTAATTGG                            |
| CSP_003850_5F | GATATACCCACTGCCTACTTACTT                          |
| CSP_003850_5R | CCTCCACTAGCTCCAGCCAAGCCCACAAATCTCATGTGGACCATAC    |
| CSP_003850_3F | GTTGGTGTGCGATGTCAGCTCCGGAGGTGTGGTGGTTTCGGTTTATG   |
| CSP_003850_3R | ACTGGAAGAGGAGGAGTAGTAG                            |
| CSP_003850_NF | CTTGACAGCTCCCGTGATT                               |
| CSP_003850_NR | AGAGCAACGGCTGGTATTAG                              |
| CSP_003850_SF | GTTTGTCTCTTCCTCCCTTCC                             |
| CSP_003850_SR | CCTTTCCCATCTGTCCTAGATTC                           |
| CSP_003850_PF | GGAGTGTTTGGAGGGATTGT                              |
| CSP_003850_PR | TTCTTACAAGACCGCCTTATT                             |
| CSP_003491_5F | GGCAATGTCGTCAAGGTAGT                              |

|               |                                                 |
|---------------|-------------------------------------------------|
| CSP_003491_5R | CCTCCACTAGCTCCAGCCAAGCCATCGTTCACCCTCAGCTTTC     |
| CSP_003491_3F | GTTGGTGTGCGATGTCAGCTCCGGAGGAGCTGGCGAGATGTTCTAAA |
| CSP_003491_3R | CATGCCCAGAGAGTGACAAA                            |
| CSP_003491_NF | GCCGGGAAATTTGCAACC                              |
| CSP_003491_NR | GCAGTCACCTAAGCACCTTAT                           |
| CSP_003491_SF | TGCCTTTCTGTCTCCATAAACT                          |
| CSP_003491_SR | GATGTTGTACTACGCGGAGATG                          |
| CSP_003491_PF | CTCGTAACTTCAGGTCGCTAAC                          |
| CSP_003491_PR | CGACACAGAATAGACCCATCAG                          |
| CSP_005482_5F | AGGTGGAATGCCAGATCAAA                            |
| CSP_005482_5R | CCTCCACTAGCTCCAGCCAAGCCCGGCCGTGGACTTAACTAAT     |
| CSP_005482_3F | GTTGGTGTGCGATGTCAGCTCCGGAGAGAGTGTCTGGCTCACA     |
| CSP_005482_3R | TGGACAAGCCTGTGGAGA                              |
| CSP_005482_NF | GCCAGCCCATTTCTACCAC                             |
| CSP_005482_NR | GCCTCACCTAGGTATCGCTT                            |
| CSP_005482_SF | GATACTTGTGCTCTCGGTCAG                           |
| CSP_005482_SR | CTTTCGTAGAGACCACCCATC                           |
| CSP_005482_PF | TCCCTCCACTCATCCTTCTC                            |
| CSP_005482_PR | GTCTTGGGCTGGTACTTGTT                            |
| CSP_005764_5F | TGTGTCGTAGGAGATGTCAAAG                          |
| CSP_005764_5R | CCTCCACTAGCTCCAGCCAAGCCCGGGTGTTCAGGTAGAAT       |
| CSP_005764_3F | GTTGGTGTGCGATGTCAGCTCCGGAGCTGGTTCAGGTGTCATGGTT  |
| CSP_005764_3R | GATGTCCAAAGGGAACAGGATAG                         |
| CSP_005764_NF | TGCGGAGTGAGAGAACCTA                             |
| CSP_005764_NR | CACGTACCAAGTGGGAAGAAA                           |
| CSP_005764_SF | CAGACGCCACTACGATTTCTAC                          |
| CSP_005764_SR | GCCCACGAGCATCACATT                              |
| CSP_005764_PF | GGTTTACCCGAGTCTACCTACT                          |
| CSP_005764_PR | GTGTAITGTCCTGCACTCTTG                           |
| CSP_006569_5F | GAAGGGTTCAC TTCAATTCAGG                         |
| CSP_006569_5R | CCTCCACTAGCTCCAGCCAAGCCCTGATGTGACAAAGTTGGCTAAG  |
| CSP_006569_3F | GTTGGTGTGCGATGTCAGCTCCGGAGTGTATCGCAGCAGTCAAA    |
| CSP_006569_3R | TGAAAGGAGCCAGCAGATAAG                           |
| CSP_006569_NF | GCTGCTCACTGCACAAATC                             |
| CSP_006569_NR | CCTCACCTTACCTTAGTATGAGAAA                       |
| CSP_006569_SF | ACTCGCTCTGCACACATT                              |
| CSP_006569_SR | GGCCCAGTGATAAAGCAAATC                           |
| CSP_006569_PF | CGTTCATCTTCCAGCGATCTAC                          |
| CSP_006569_PR | CTCGCCTCCAAACACTCATT                            |
| CSP_006607_5F | GATCTACACCGTCACCACAAA                           |
| CSP_006607_5R | CCTCCACTAGCTCCAGCCAAGCCGGTAGATGGGACGTTGCTTT     |
| CSP_006607_3F | GTTGGTGTGCGATGTCAGCTCCGGAGCAACGACGACGACAGTATGG  |
| CSP_006607_3R | GTGTCCTGCCATCTACTTG                             |
| CSP_006607_NF | GAGAACGGCGAAGACGAGTG                            |
| CSP_006607_NR | TTGCCCTGCTCTTTCAG                               |

|               |                                                      |
|---------------|------------------------------------------------------|
| CSP_006607_SF | CACCAGGGACCTTTGGTAT                                  |
| CSP_006607_SR | CATCGACGTGTGAACGAAAC                                 |
| CSP_006607_PF | CCATTCCAGTTCAGGTCTA                                  |
| CSP_006607_PR | TCGCTATCCAGACCATTCC                                  |
| CSP_006607_5F | GTGTCCAAGCCTGCTTCTT                                  |
| CSP_007586_5R | CCTCCACTAGCTCCAGCCAAGCCGGCCAAGGATGAAGGAGATG          |
| CSP_007586_3F | GTTGGTGTCGATGTCAGCTCCGGAGAGAGTAGCTAAGCACCGAGT        |
| CSP_007586_3R | CCTACCGTGGTCTCTTTGATTG                               |
| CSP_007586_NF | CGAATAGACCGGTATCCAGAAC                               |
| CSP_007586_NR | CCTTCCCAATGGCATTCTCTA                                |
| CSP_007586_SF | GGCTGAAAGGTACCCAGTATT                                |
| CSP_007586_SR | AGCCGTATTCGCCAGTTT                                   |
| CSP_007586_PF | G TTCAGTTGACACGGGATGA                                |
| CSP_007586_PR | GACGACGATGACGATGATGAA                                |
| CSP_008738_5F | CTACTTACGACGAACCTCTGAC                               |
| CSP_008738_5R | CCTCCACTAGCTCCAGCCAAGCCGCTTCTATCCTTATCGCTCACT        |
| CSP_008738_3F | GTTGGTGTCGATGTCAGCTCCGGAGGTTTGGGCAATATTCTCGCTAC      |
| CSP_008738_3R | CTGGAGCATTTCGCTACTTTCG                               |
| CSP_008738_NF | CCACGAAGACCAATAGGAGAATA                              |
| CSP_008738_NR | CGCACTCTACCTGATGTTTGA                                |
| CSP_008738_SF | AACTCGAAGTCTCGCCAATAA                                |
| CSP_008738_SR | CGCTGAGATTGACCACTAGAA                                |
| CSP_008738_PF | TGAGAGCCAGAGCTTGTTTAG                                |
| CSP_008738_PR | CTACCGCCTTAGCCTTGATT                                 |
| CSP_009802_5F | TTGACGAGTCTGTCCGTTTG                                 |
| CSP_009802_5R | CCTCCACTAGCTCCAGCCAAGCCCGTGGTCTAGGGTATTGAATGAG       |
| CSP_009802_3F | GTTGGTGTCGATGTCAGCTCCGGAGCGTACTTTAGTACCTATCAGTGAACCT |
| CSP_009802_3R | GACCATCTGGCGTGACTTATC                                |
| CSP_009802_NF | GGACAGGACCGGTGATACT                                  |
| CSP_009802_NR | CAGCCAAATCTCCTTGGGTAG                                |
| CSP_009802_SF | GATCGCTCGCGTACTGAAATA                                |
| CSP_009802_SR | GACGAGAAACACAACCTCATAAATC                            |
| CSP_009802_PF | TGAAAGGTACCTGGCCAATC                                 |
| CSP_009802_PR | CGGGCCATTGACTGTATTAGT                                |
| CSP_010617_5F | AGGAGGTAGCTGTCAGAGAA                                 |
| CSP_010617_5R | CCTCCACTAGCTCCAGCCAAGCCCGACTTCAAGAGGGTCGATAA         |
| CSP_010617_3F | GTTGGTGTCGATGTCAGCTCCGGAGCAGATGGGATTGCAGATCGATAG     |
| CSP_010617_3R | CTAATTA CTGCTGGCTGGGTAG                              |
| CSP_010617_NF | GCTGACTGAGTTGTGGTCTAAC                               |
| CSP_010617_NR | GCAGAAGGCGGGTCAATTAT                                 |
| CSP_010617_SF | CAGTGTCTTCCCTCTCATTGG                                |
| CSP_010617_SR | GATTCGTCGCCTGGAAC T                                  |
| CSP_010617_PF | CCATGCACAGCGATTTCTTTC                                |
| CSP_009947_5F | AAGCTAGCTAGGTACGTATT                                 |
| CSP_009947_5R | CCTCCACTAGCTCCAGCCAAGCCGTCAAAGCCTCAAAGTTGTGTTG       |
| CSP_009947_3F | GTTGGTGTCGATGTCAGCTCCGGAGTGATGGGACATCATCTGAAAGGTAGG  |

|               |                                                  |
|---------------|--------------------------------------------------|
| CSP_009947_3R | GCTGTGGACTGTGTATACTGAT                           |
| CSP_009947_NF | CCTAACCCCTTTGGGCCTATATT                          |
| CSP_009947_NR | ACCCGTGTCTGAATCTGAATG                            |
| CSP_009947_SF | GGATCAGGTTAGTGCCATGAG                            |
| CSP_009947_SR | GACCACAGTATGCGGAGTTT                             |
| CSP_009947_PF | GCCTAACCCCTTTAGCCCTATATT                         |
| CSP_009947_PR | TACTGACGGCTAGGACGATAA                            |
| CSP_010985_5F | GGACGGCAAGGATGAAGAT                              |
| CSP_010985_5R | CCTCCACTAGCTCCAGCCAAGCCGGTAGCAACGGACAGATACAA     |
| CSP_010985_3F | GTTGGTGTCTGATGTCAGCTCCGGAGGTCGAAGCTAGGAGTCGTAAAC |
| CSP_010985_3R | TTATGAGCTTGTATCCGGTATGT                          |
| CSP_010985_NF | CGCTCTGTTCAGTTCGACTATG                           |
| CSP_010985_NR | AACGAGGTGTGGAGGTAAGA                             |
| CSP_010985_SF | CCCATGTTGTTGGACTTGTATCT                          |
| CSP_010985_SR | CCCGTGTCTTGTCCAATCTTC                            |
| CSP_010985_PF | GGGACAGGCGTGACAATAAA                             |
| CSP_010985_PR | CACACTCACGACCAAATACGA                            |
| CSP_011033_5F | ACCTATCTTGTCCCTCGTTTG                            |
| CSP_011033_5R | CCTCCACTAGCTCCAGCCAAGCCGATGGTGTGGTCTGATGTGGAGA   |
| CSP_011033_3F | GTTGGTGTCTGATGTCAGCTCCGGAGGAACAGAAGCAAGCGAGAGA   |
| CSP_011033_3R | TACGCAGCACAGATACGAAG                             |
| CSP_011033_NF | CCTCACCTCACCTCACCTCA                             |
| CSP_011033_NR | GGAGACTGGGACTAGGCGTT                             |
| CSP_011033_SF | CGATCCCACCCTTCCTTTC                              |
| CSP_011033_SR | TCTCCTATCCGTCCCCTATG                             |
| CSP_011033_PF | CCTCTATTCTCTGGATGCTCTG                           |
| CSP_011033_PR | GCAGGTAATTTGTCTGGTTGAG                           |
